# Supplementary figures and images for: A Metabolic Signature of Hereditary Transthyretin Amyloidosis: A Pilot Study
Source: MDPI journal article supplement (doi:10.3390/ijms232416133), 2022-12-17

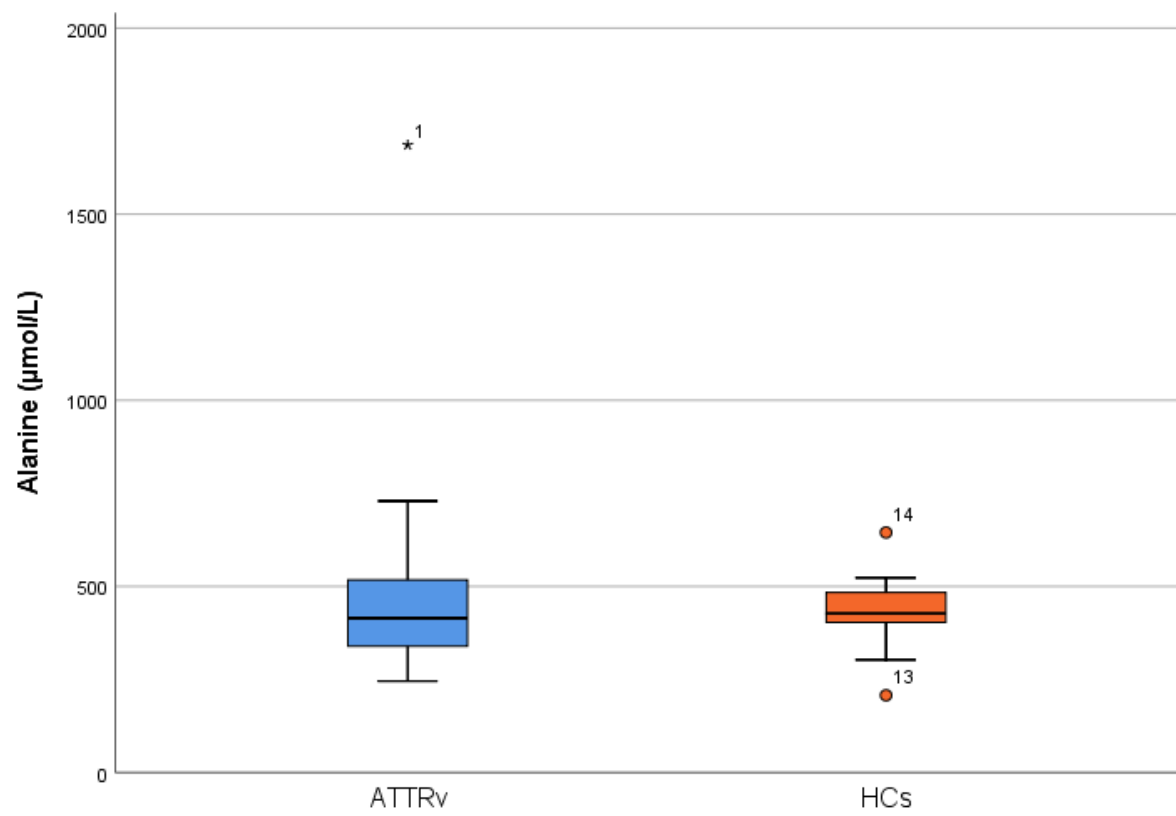

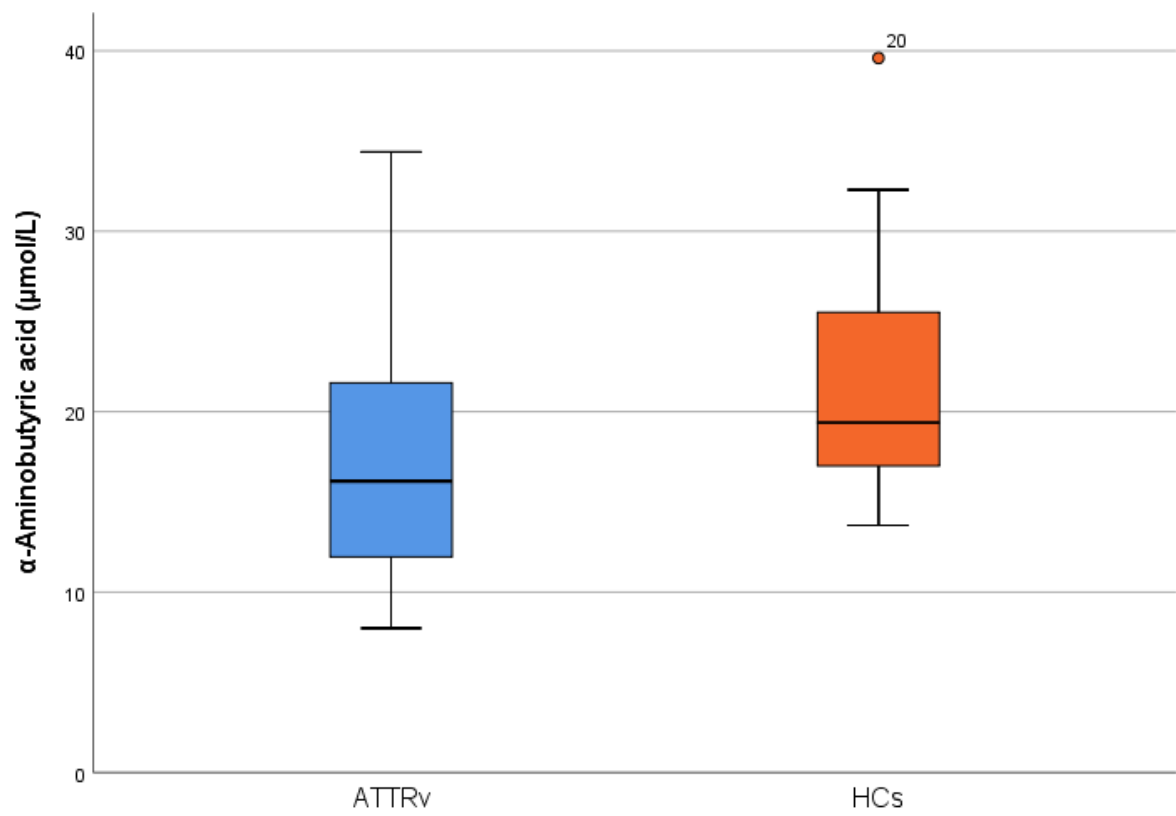

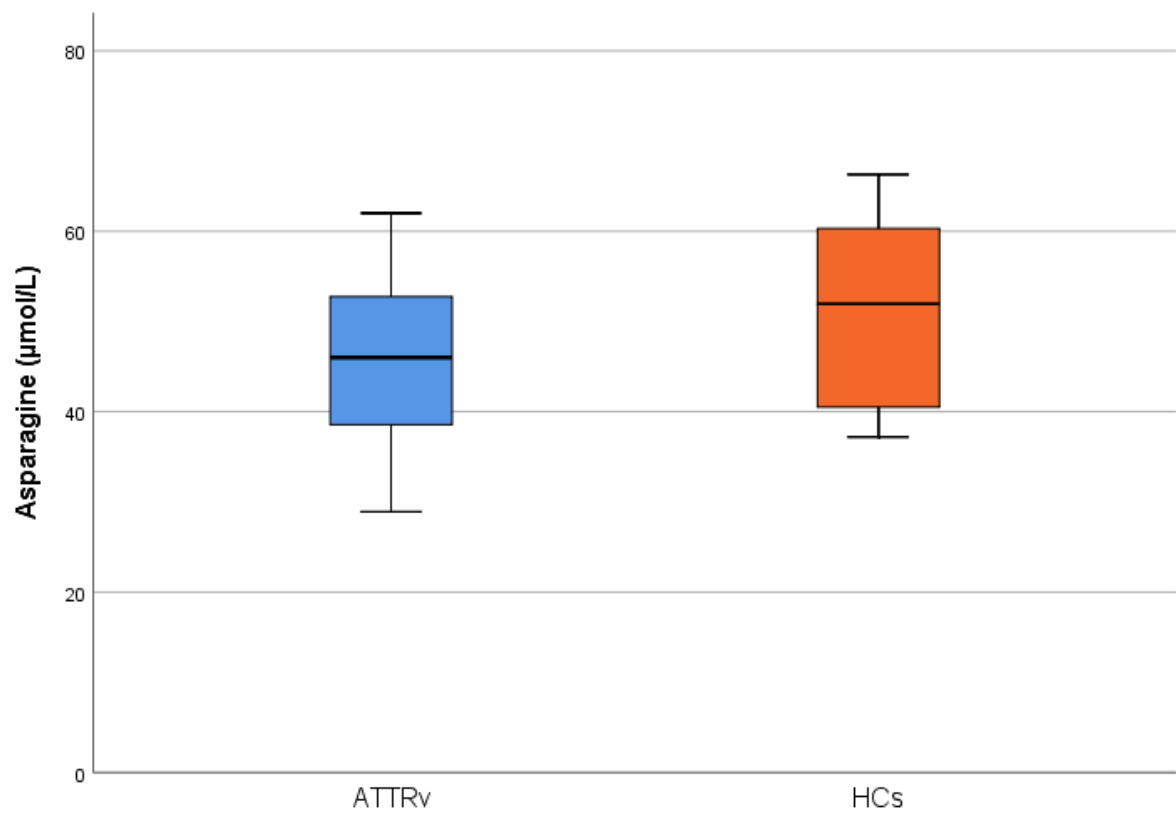

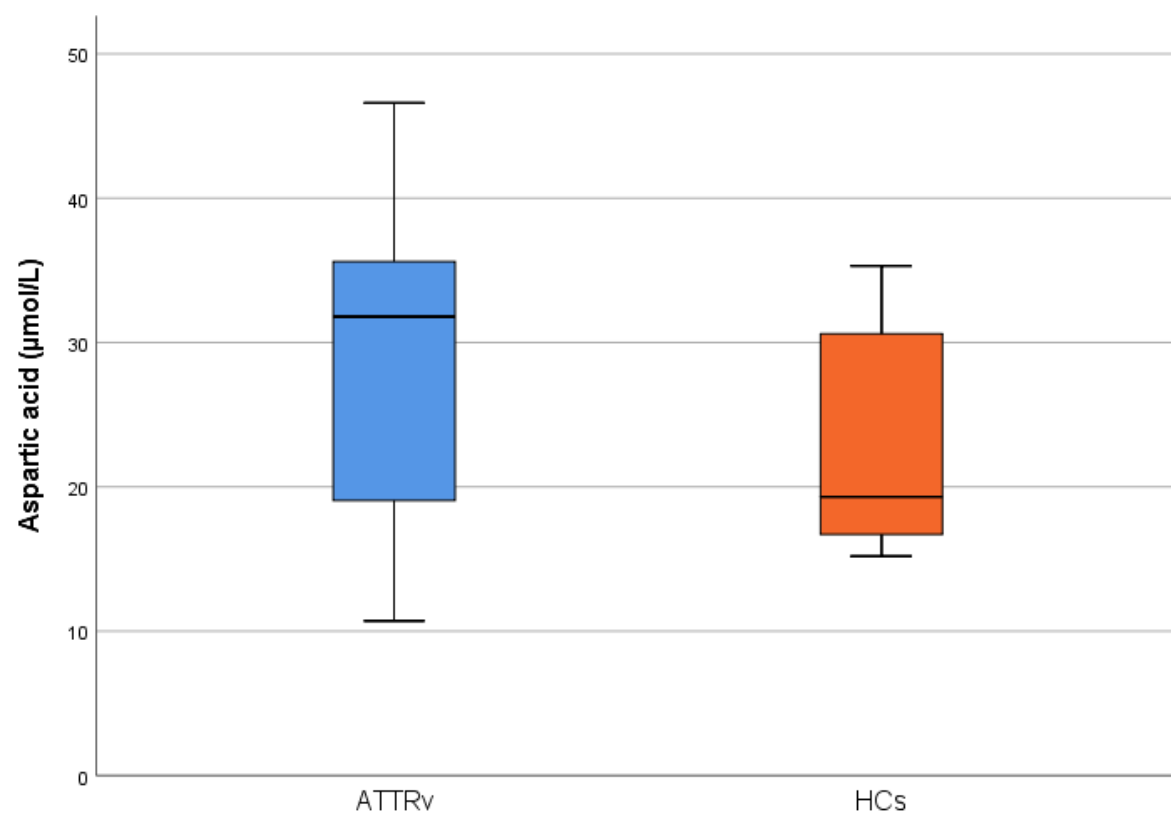

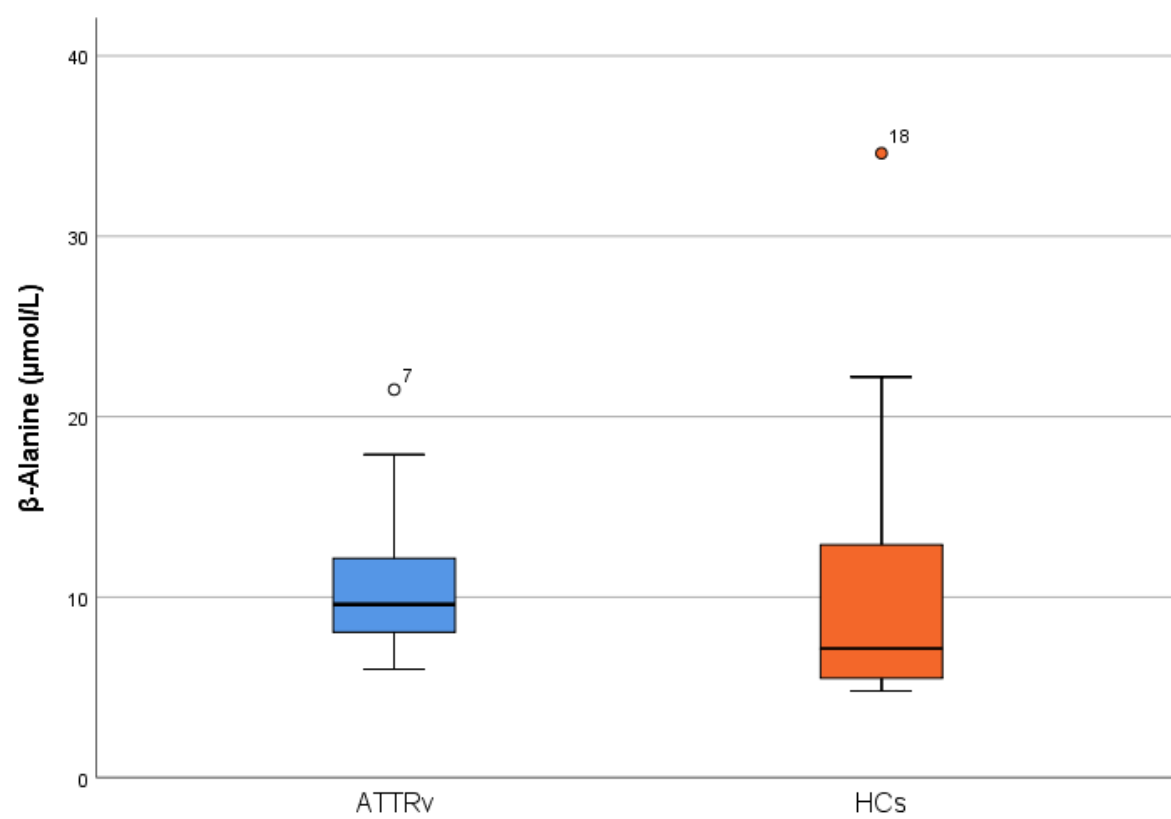

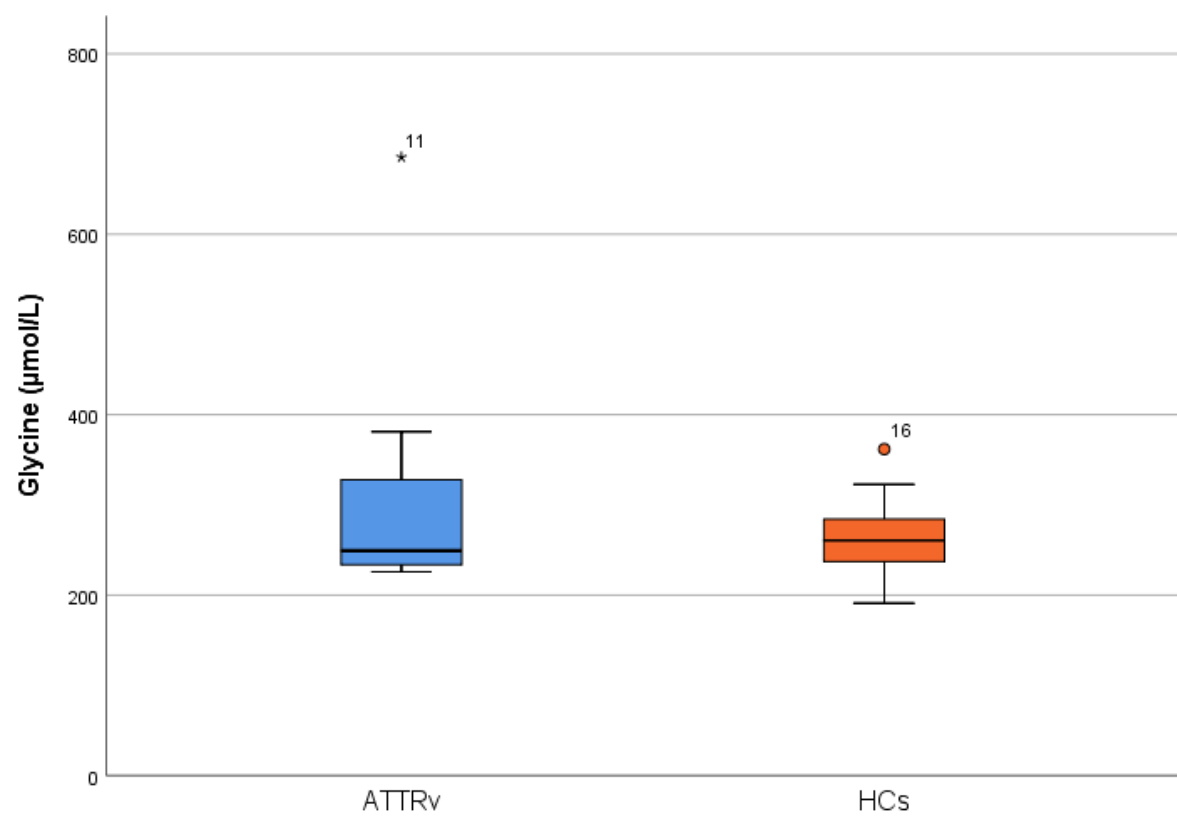

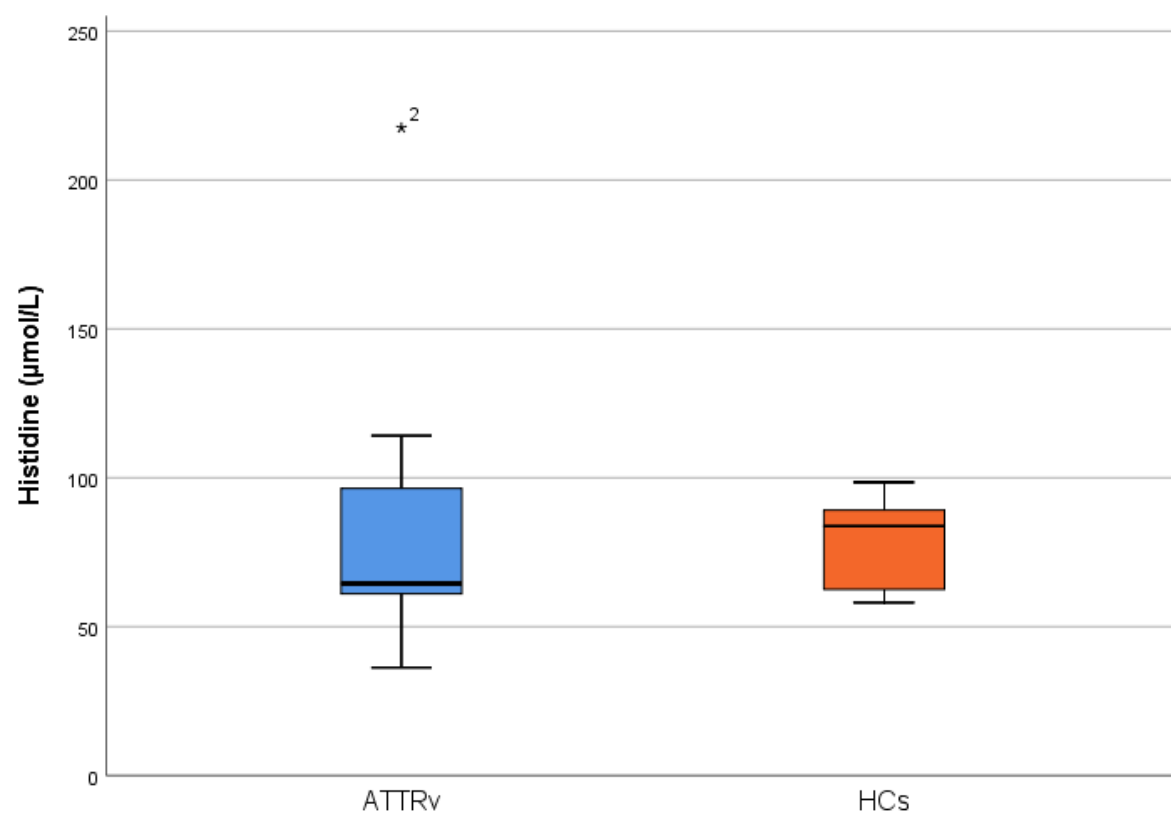

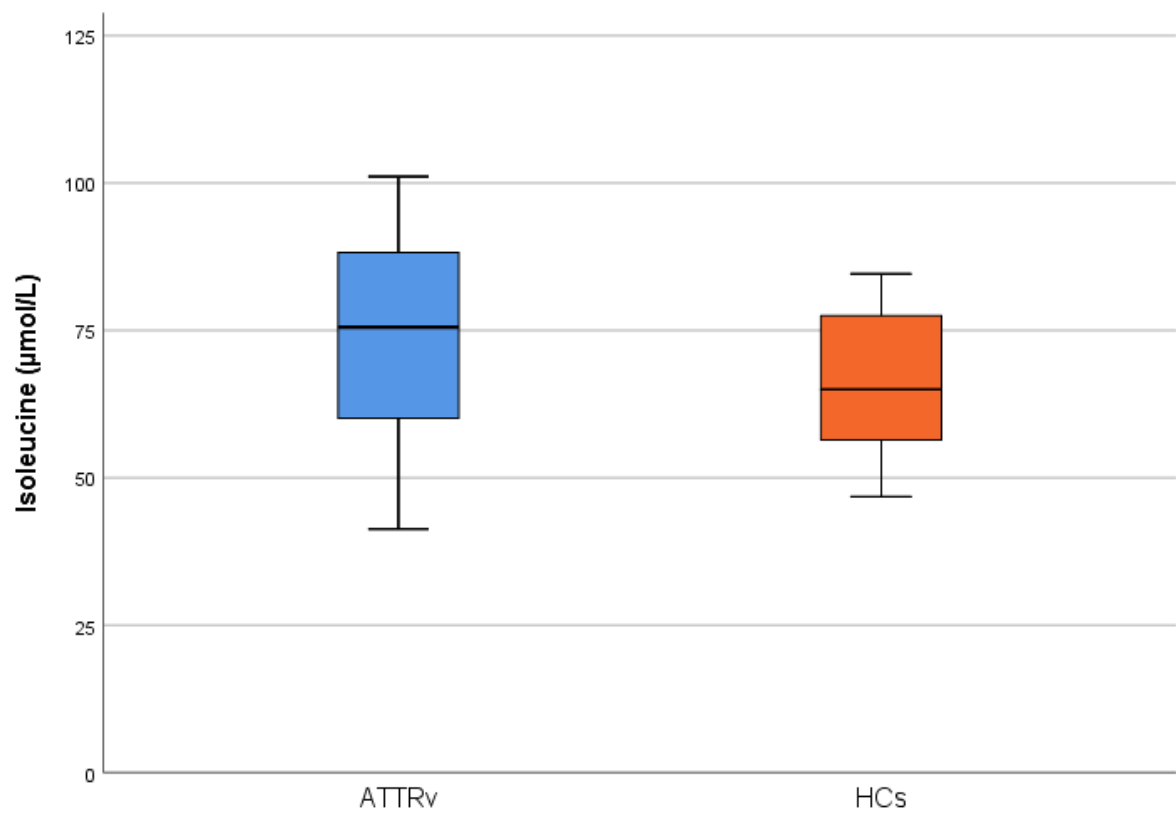



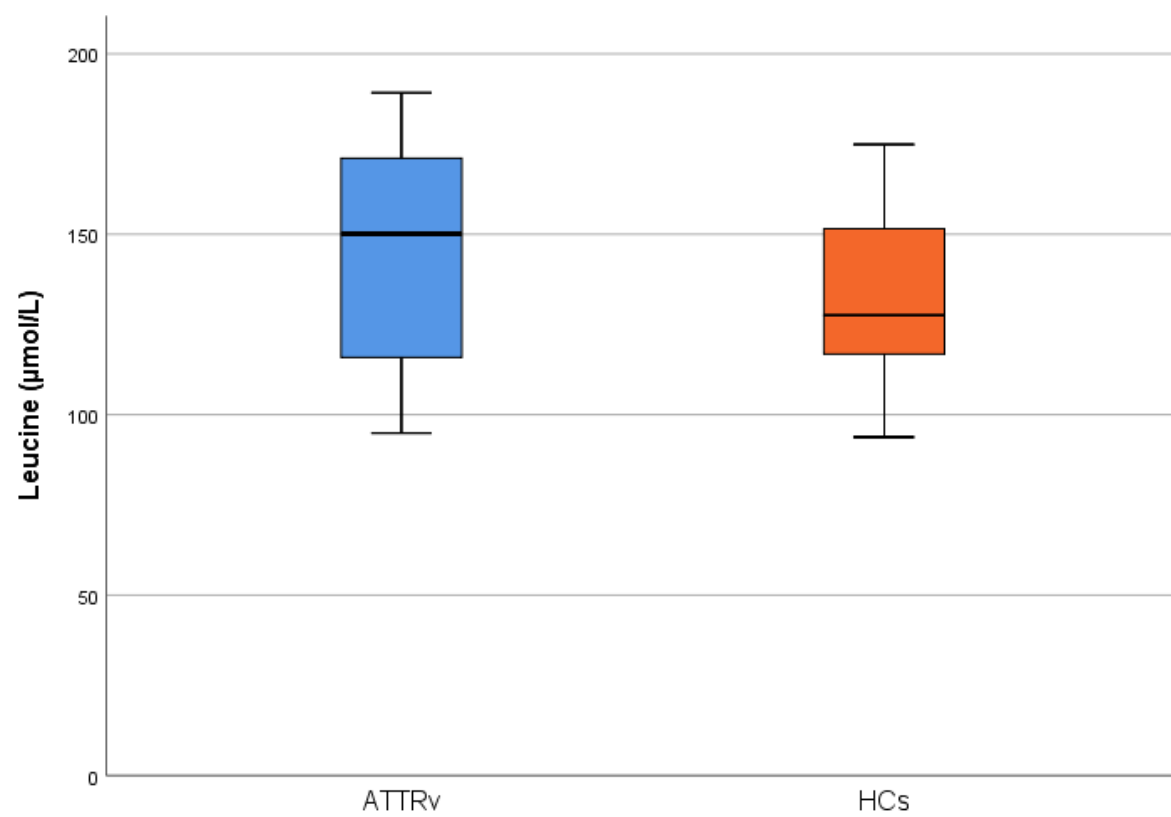

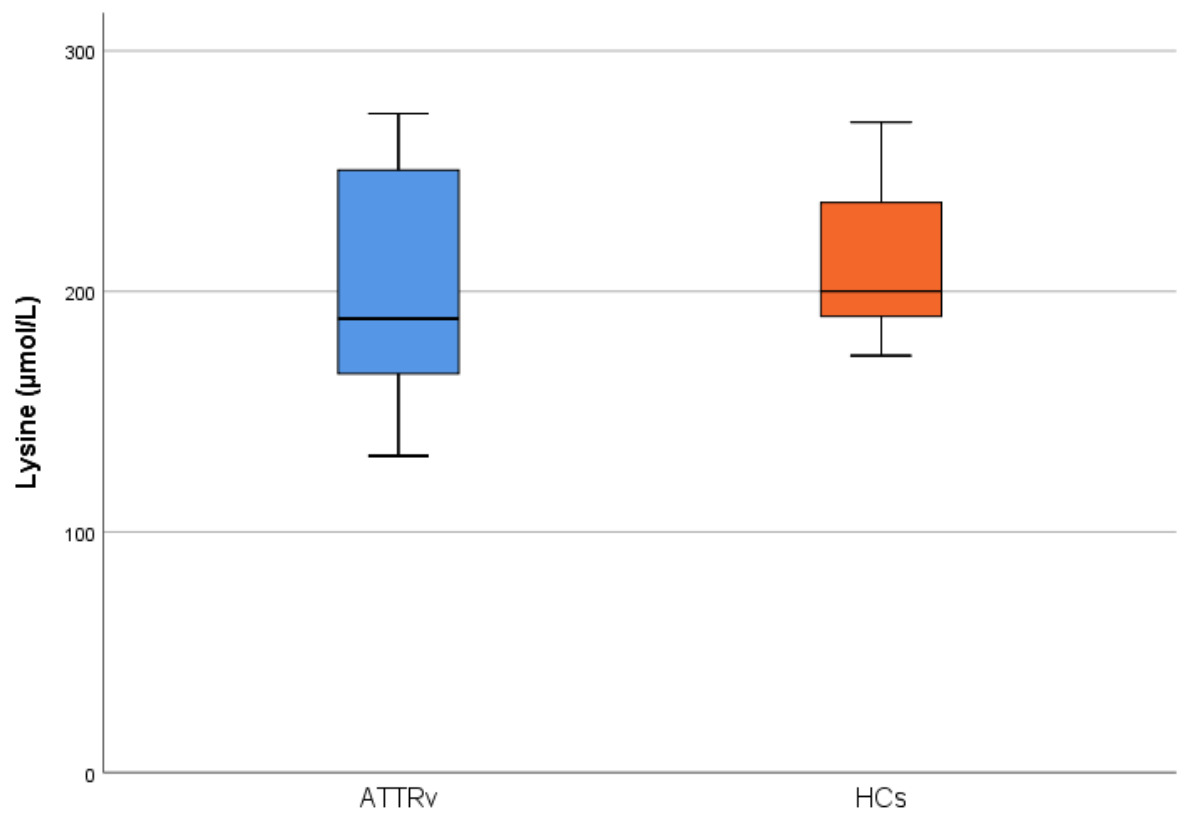

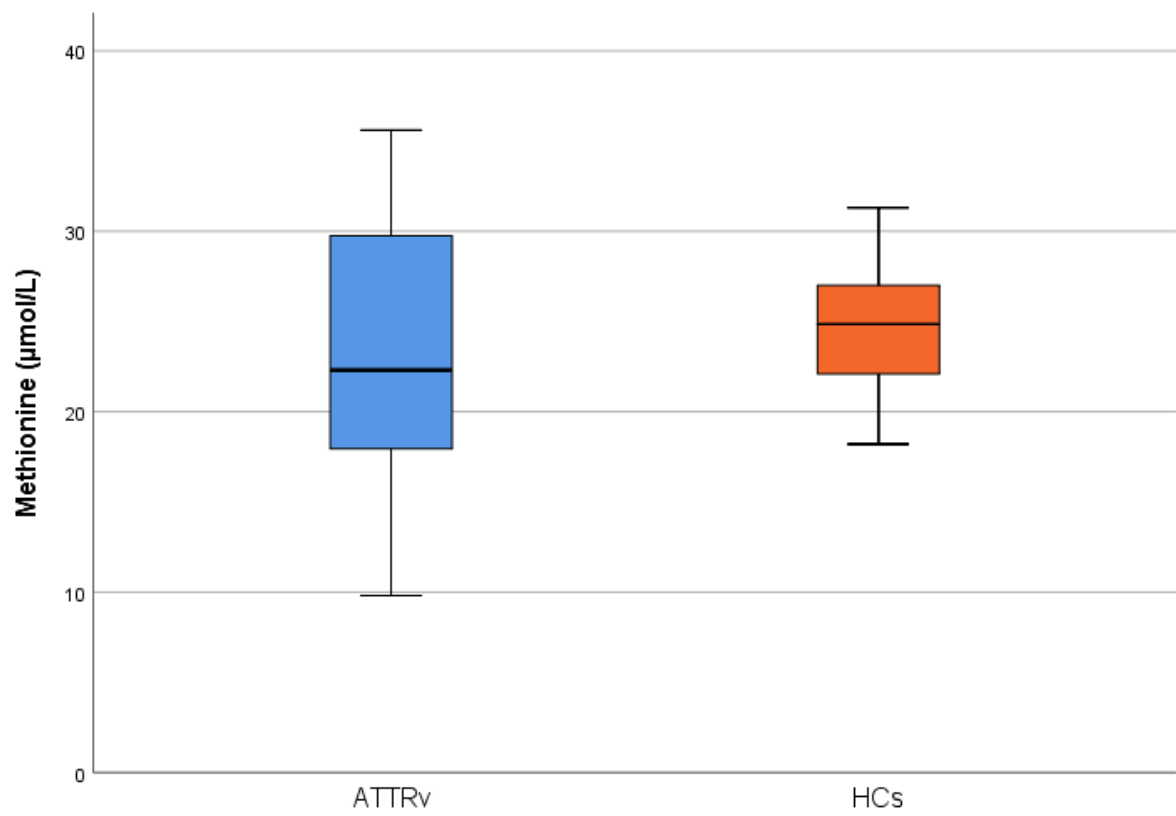

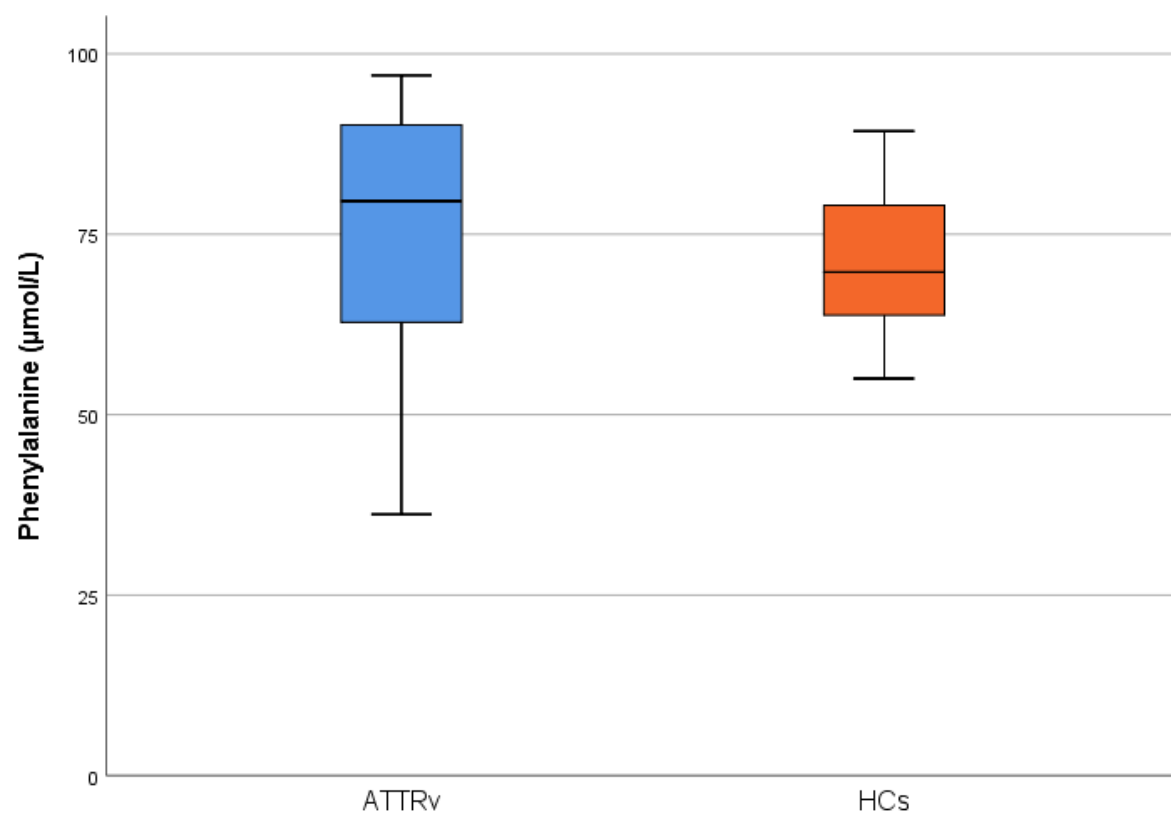

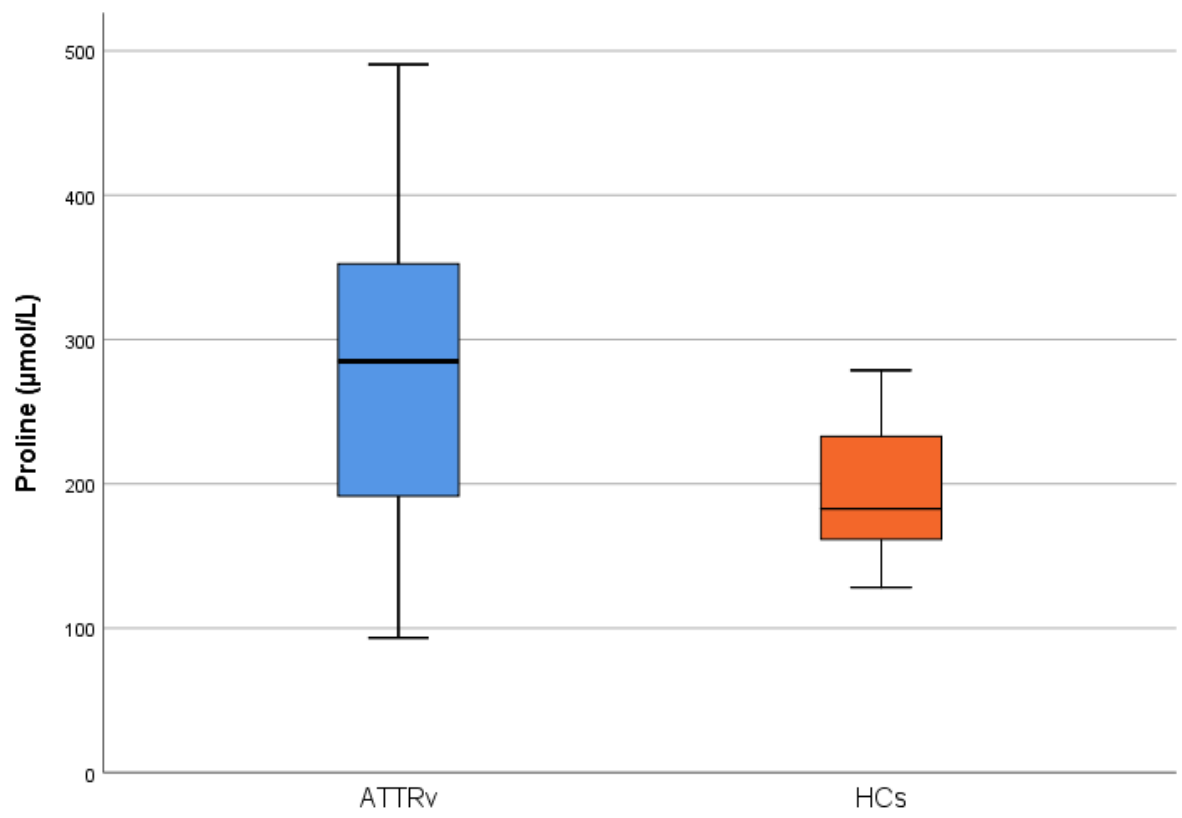

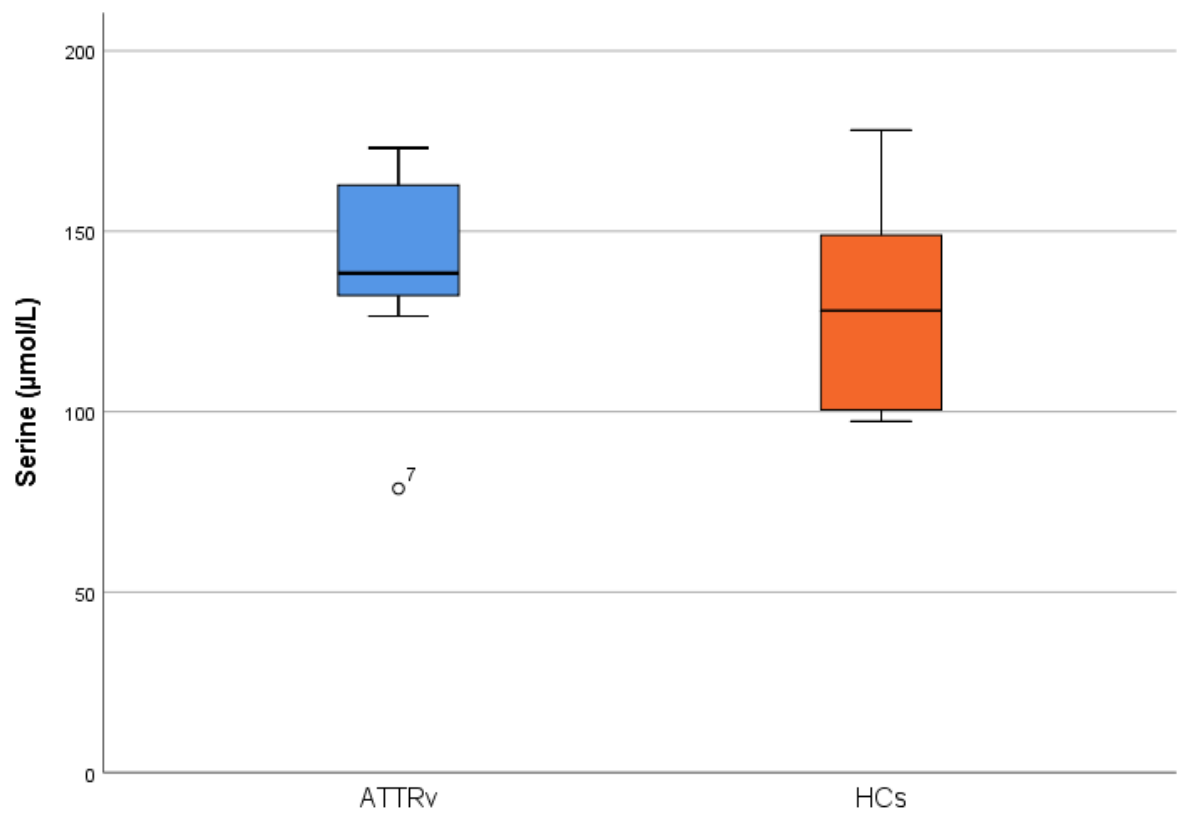

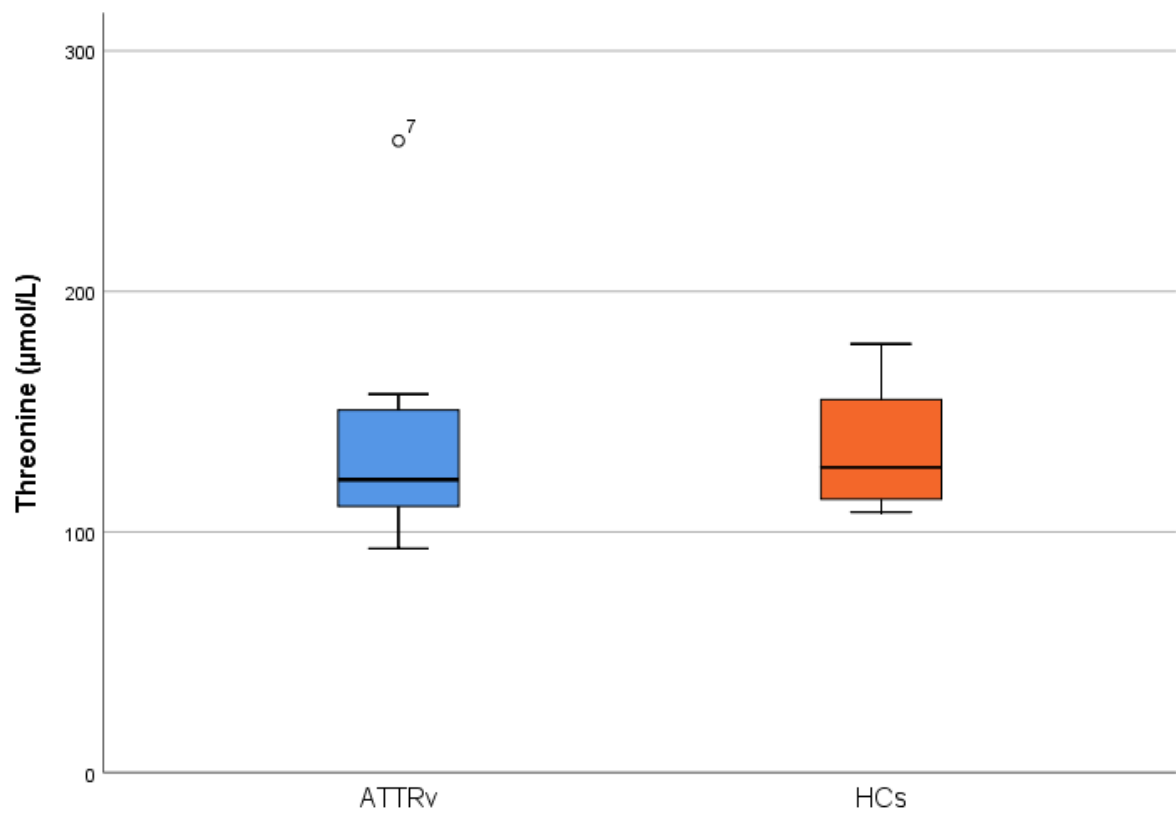

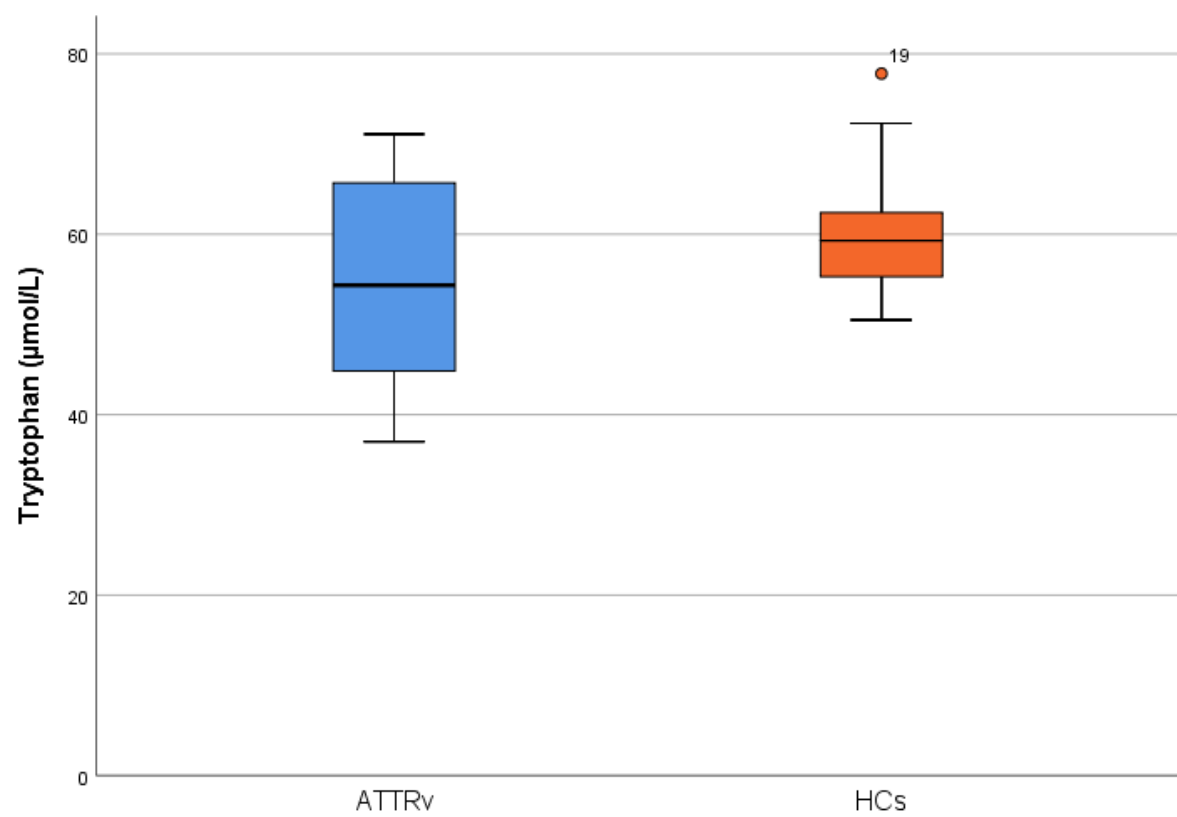



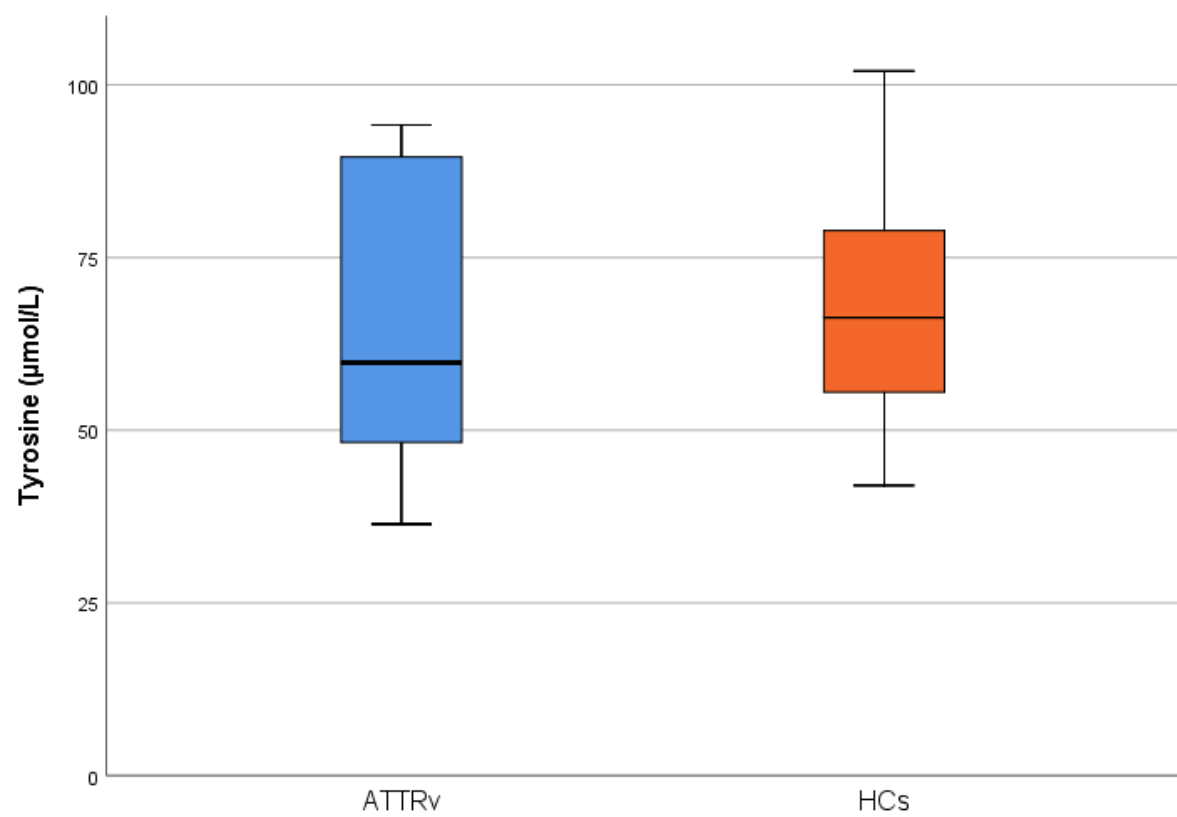

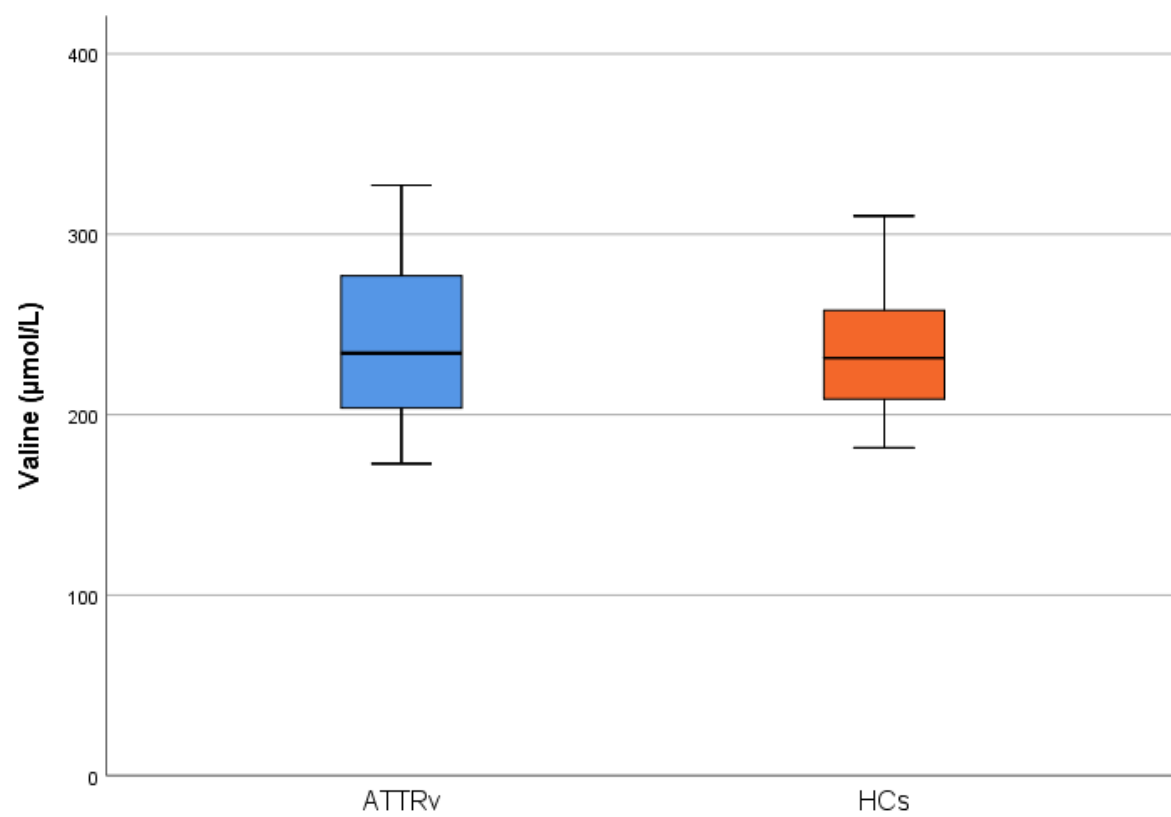

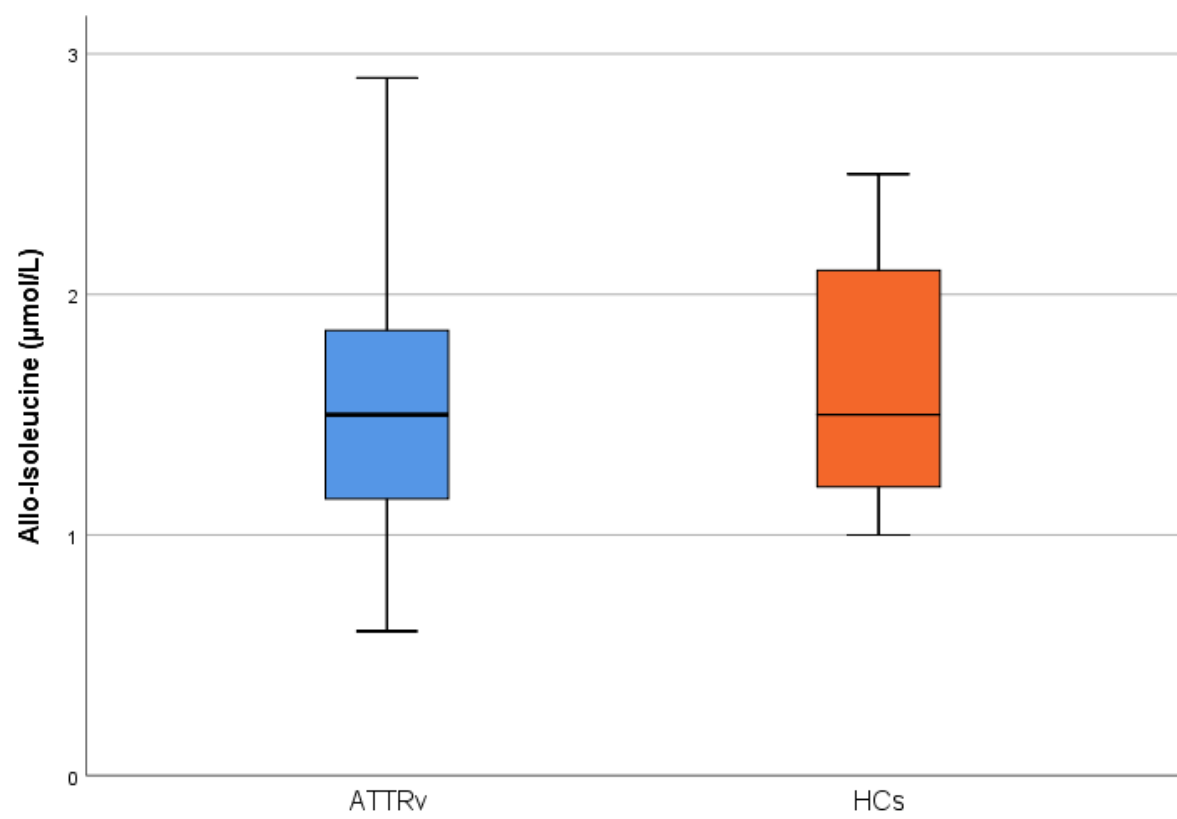

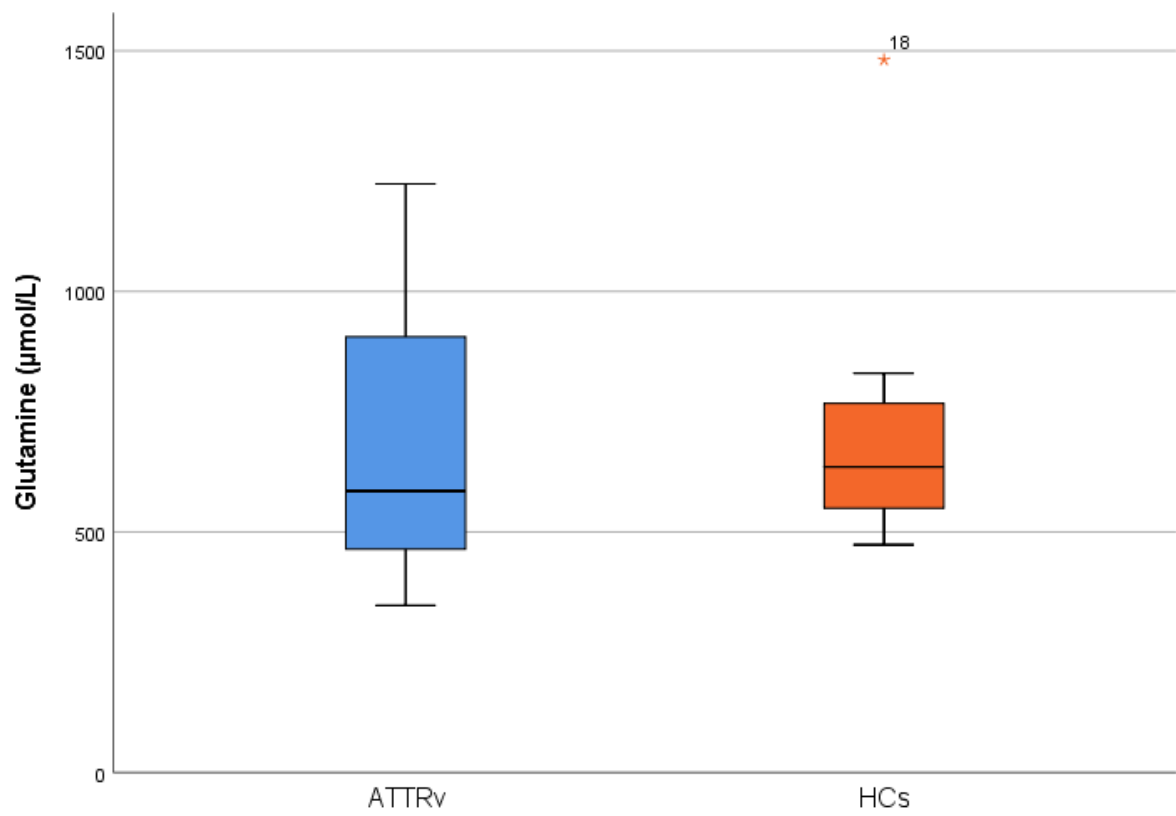

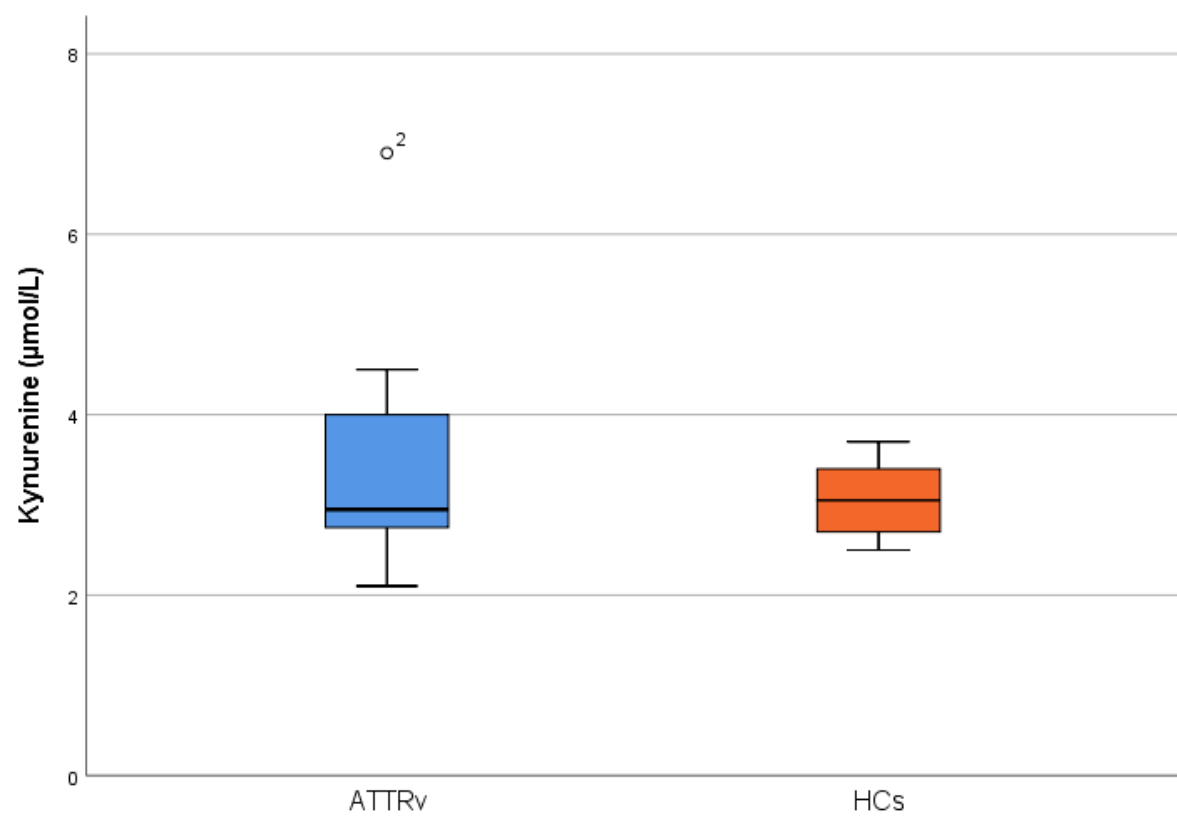

Supplement: s1 [file s1]

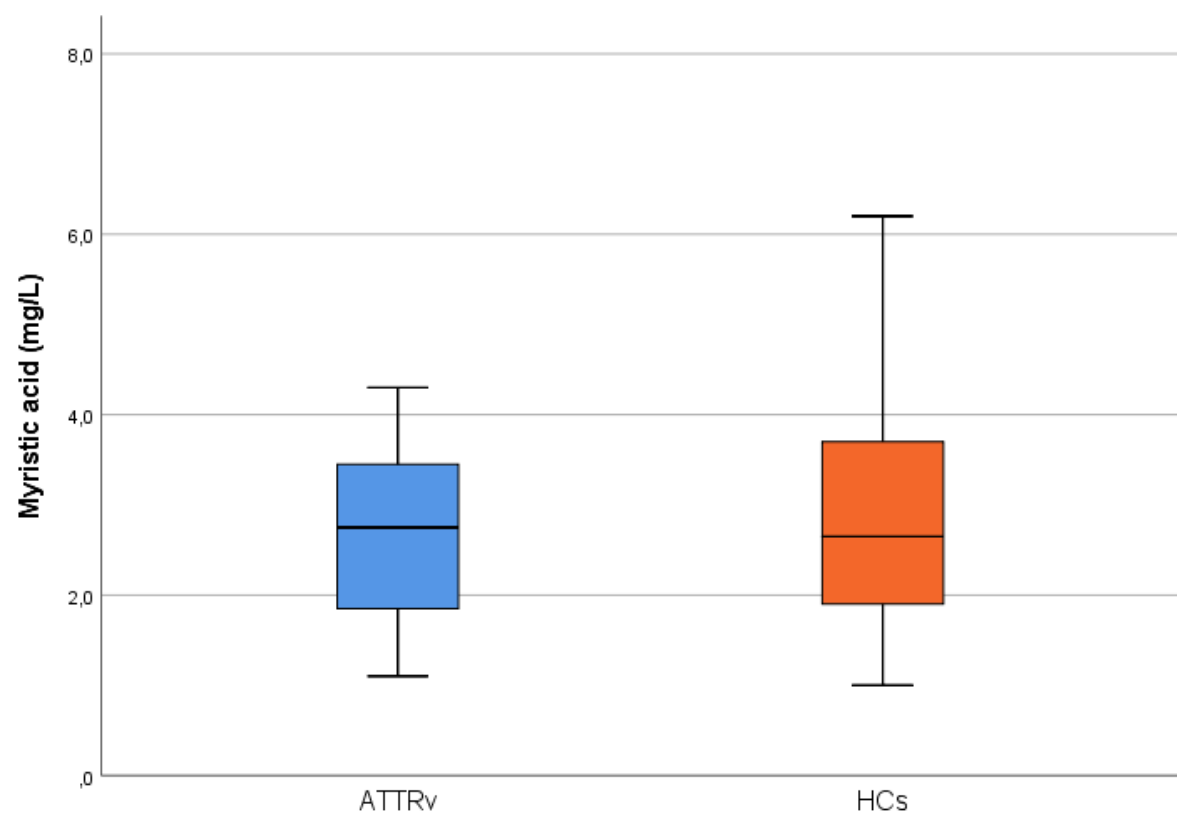

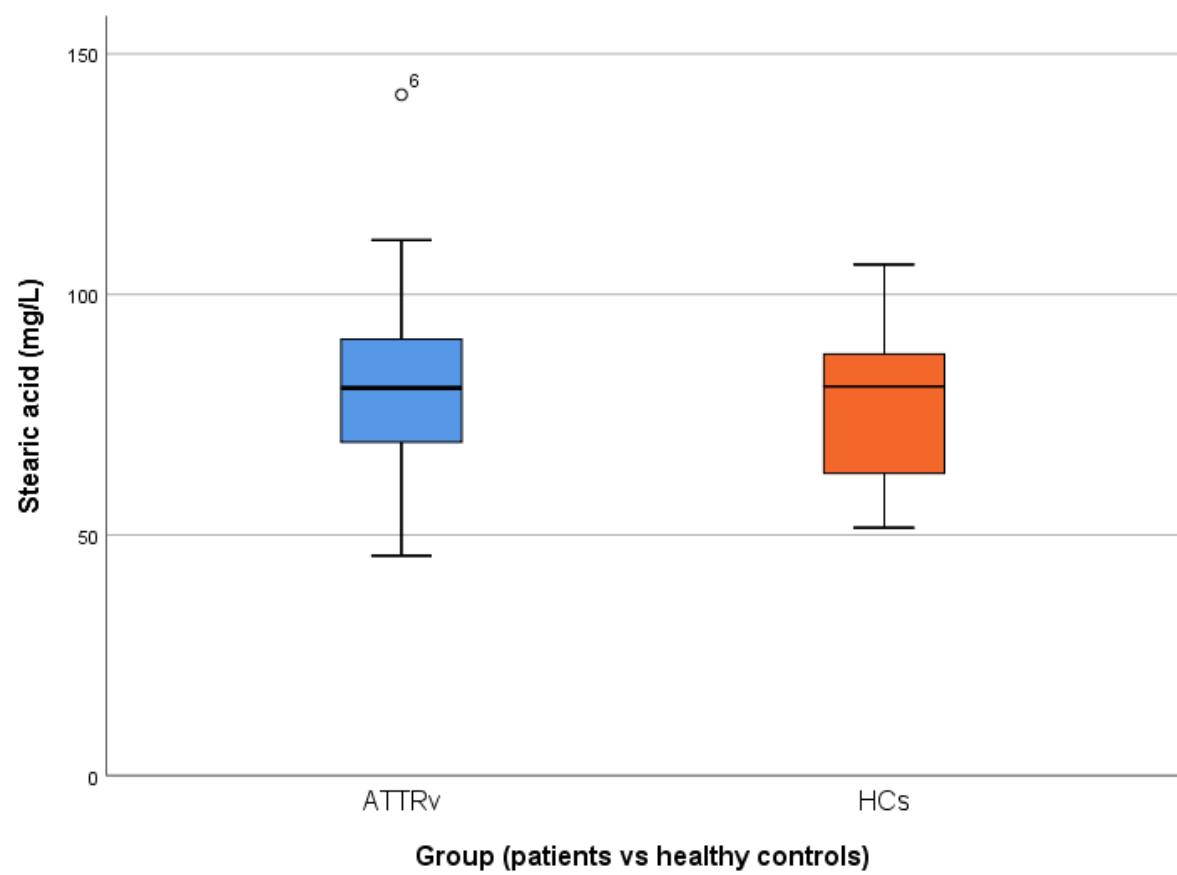

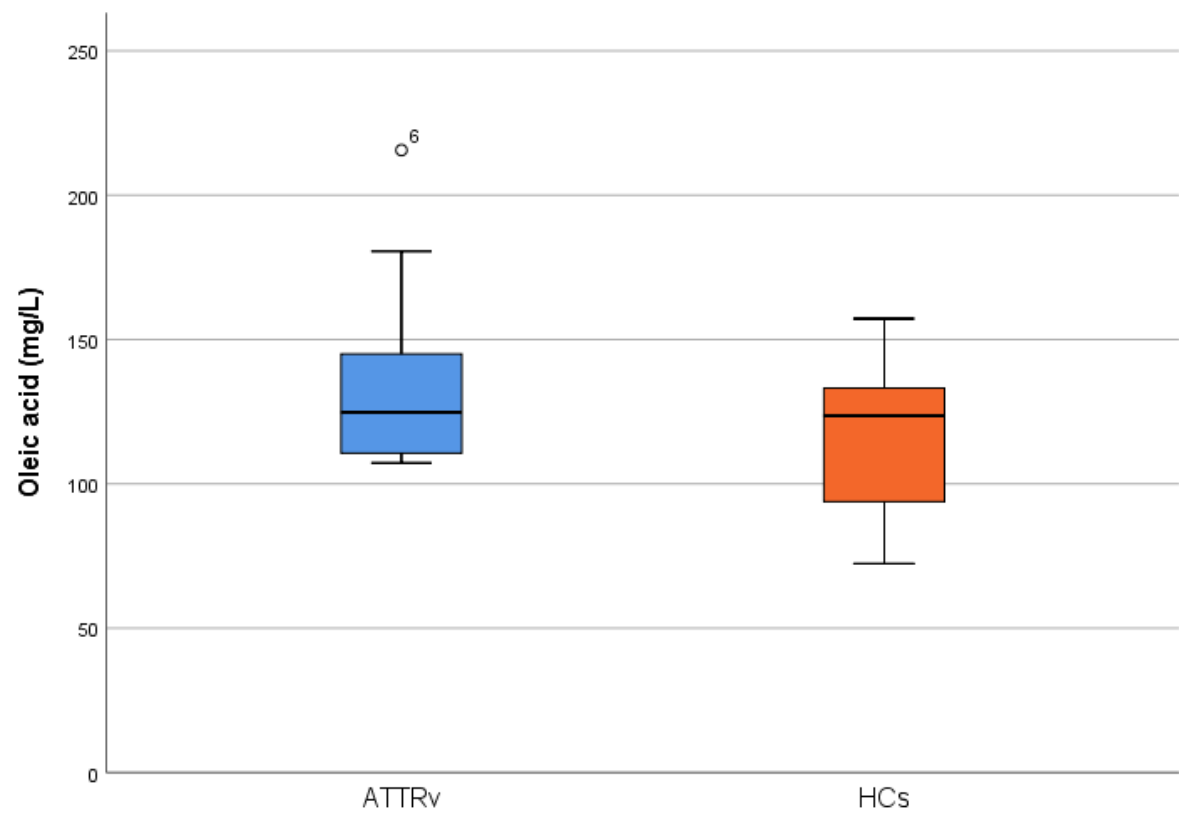

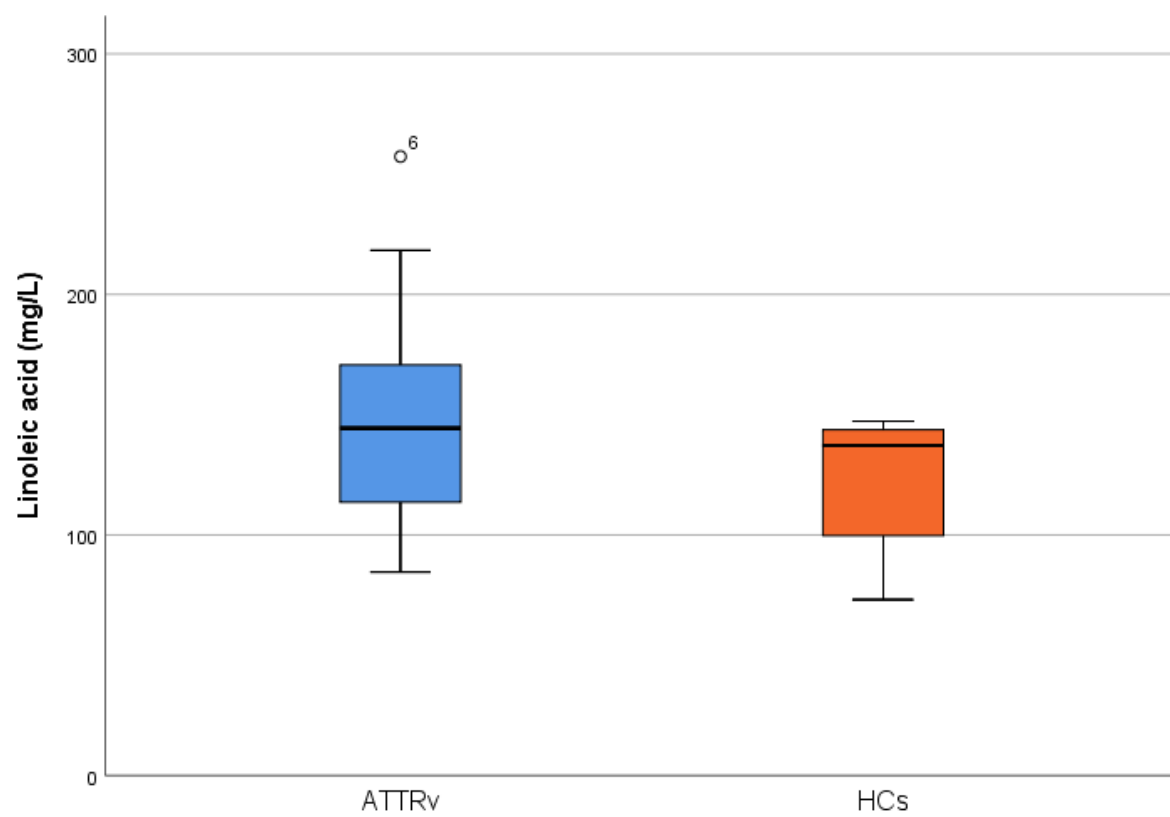

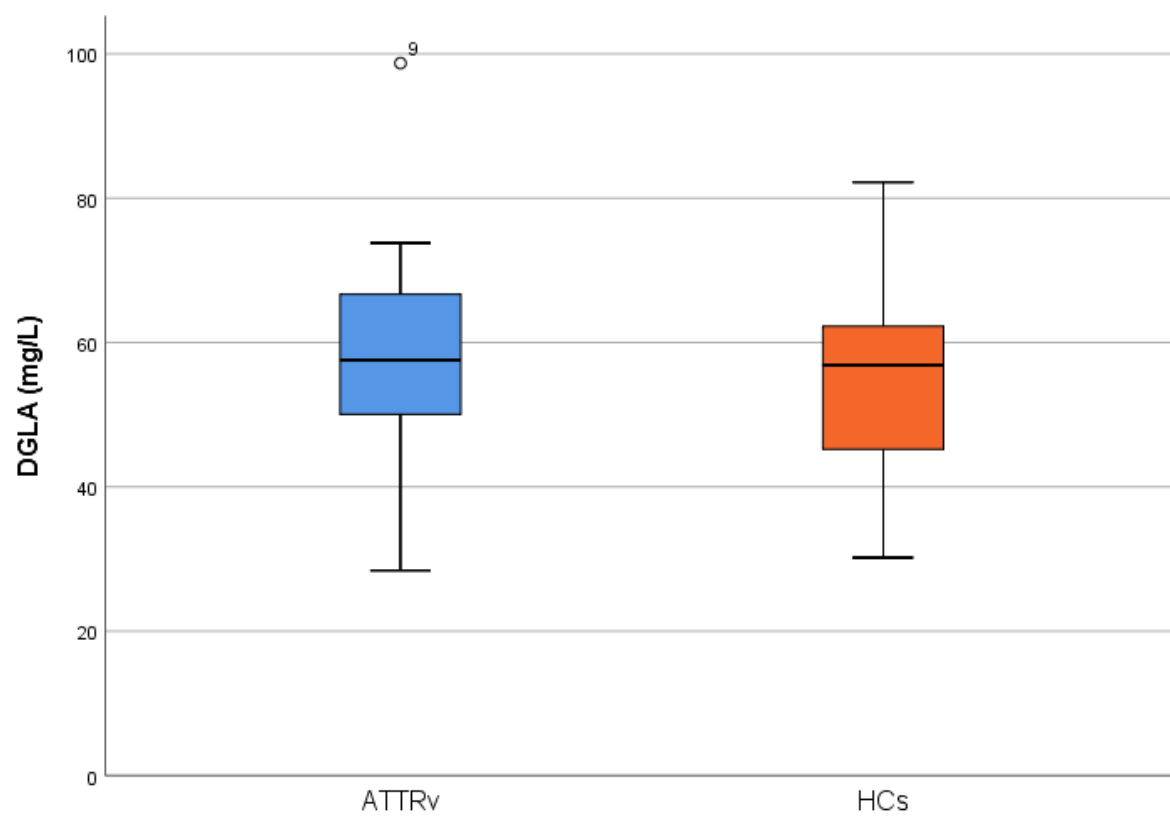

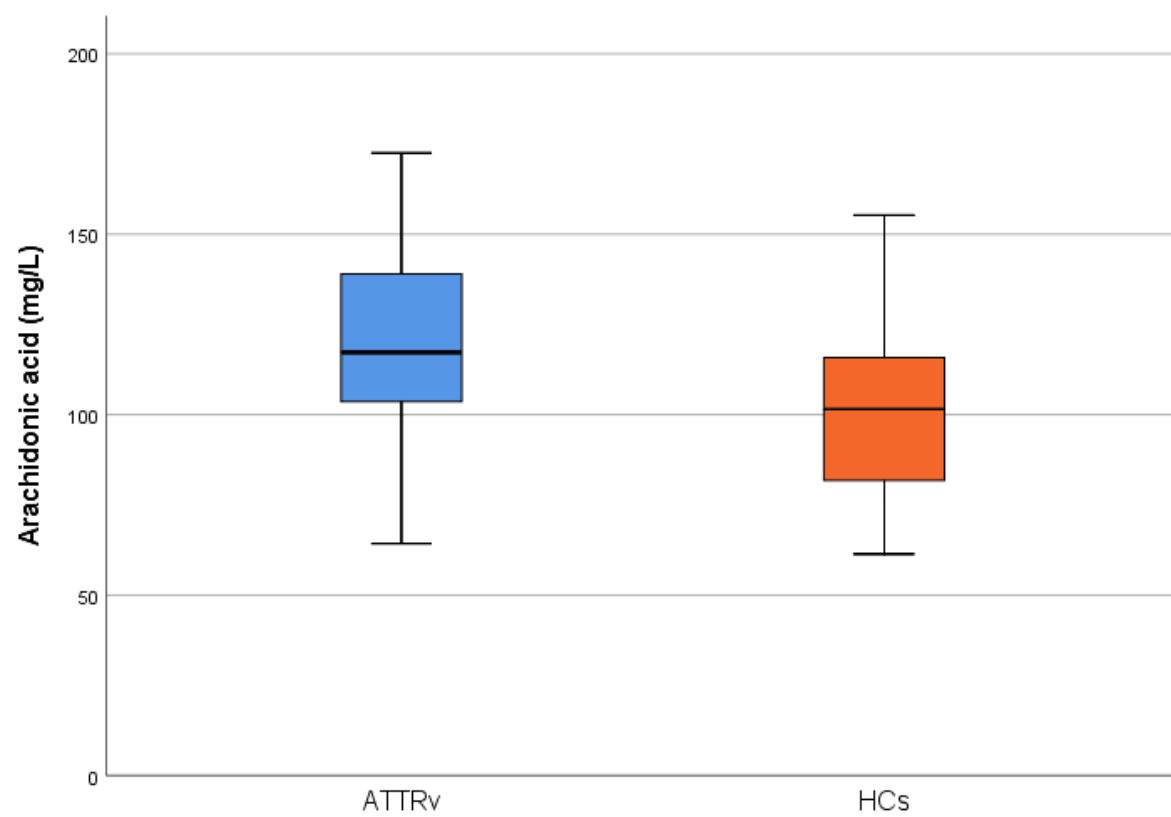

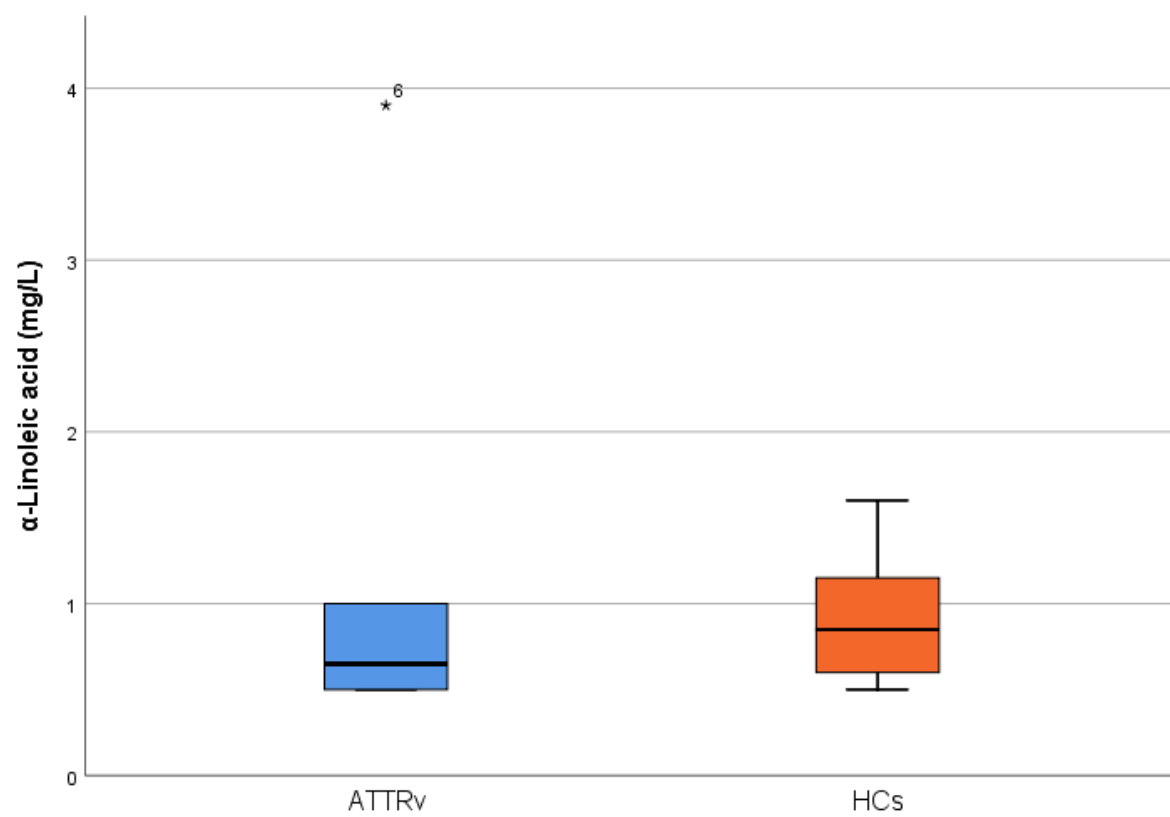

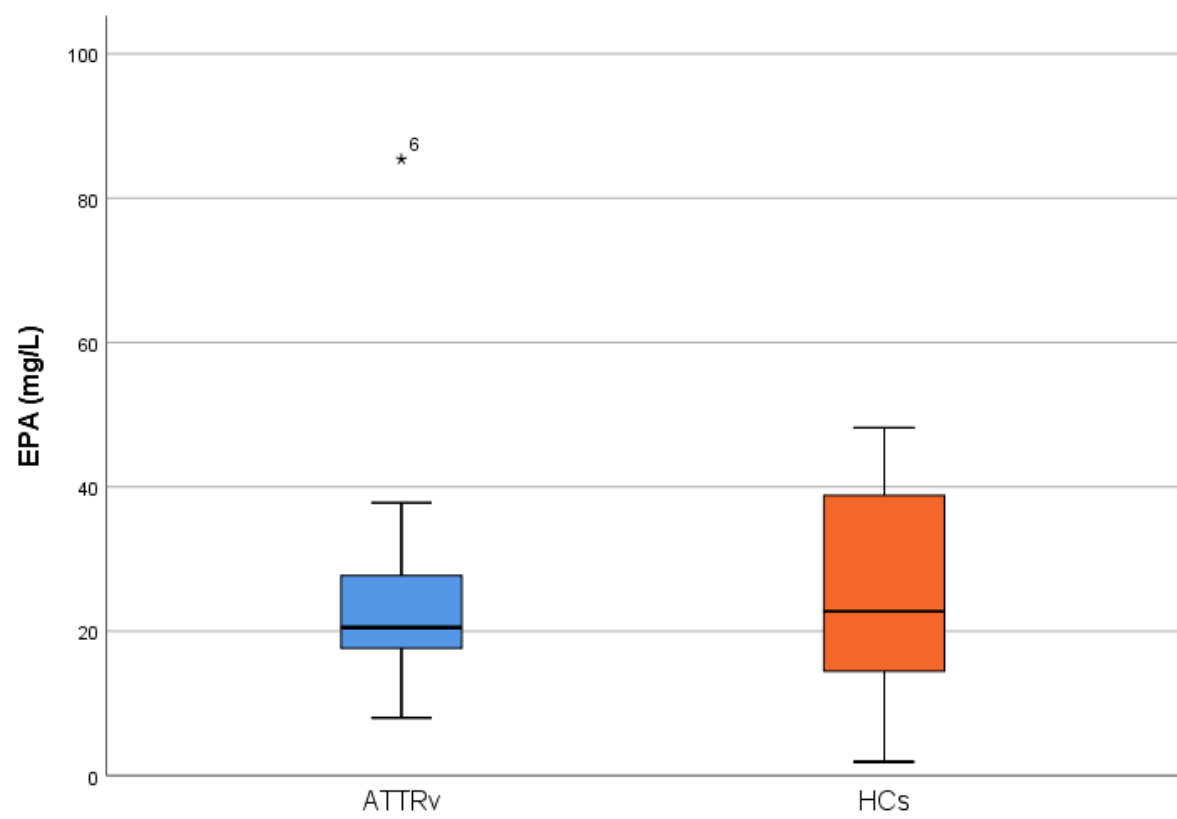



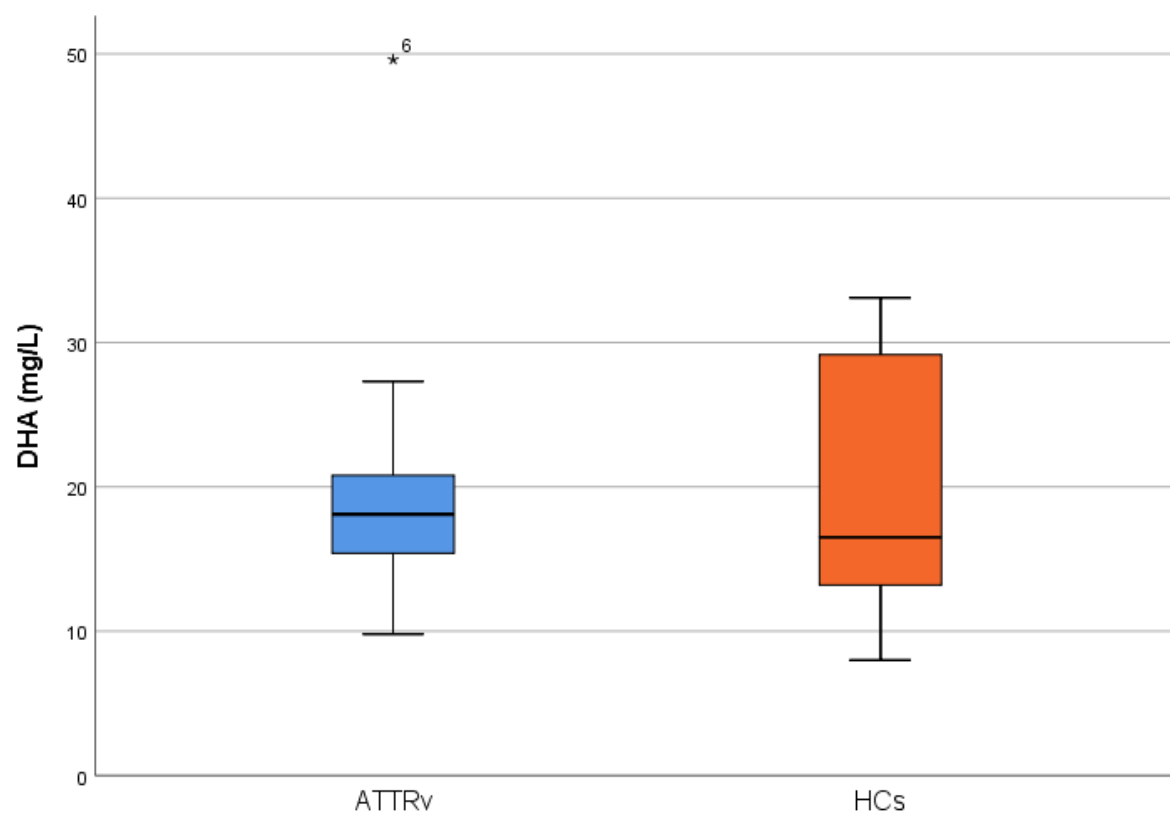

Supplement: s1 [file s1]
